# Supplementary material for: Polyspecific Intravenous Immunoglobulin in Clindamycin-treated Patients With Streptococcal Toxic Shock Syndrome: A Systematic Review and Meta-analysis
Source: PubMed Central journal article supplement (PMC6186853; doi:10.1093/cid/ciy401), 2018-05-18
Supplement: ciy401_suppl_supplementary_material.pdf [file ciy401_suppl_supplementary_material.pdf]

Search strategy: MEDLINE/EMBASE (OVID)

1. (streptococcus or streptococcal).af.
2. limit 1 to english language
3. limit 2 to yr="1980 - 2017"
4. (intravenous immunoglobulin or ivig).af.
5. 3 and 4

### Supplementary Figure 1. Search strategy

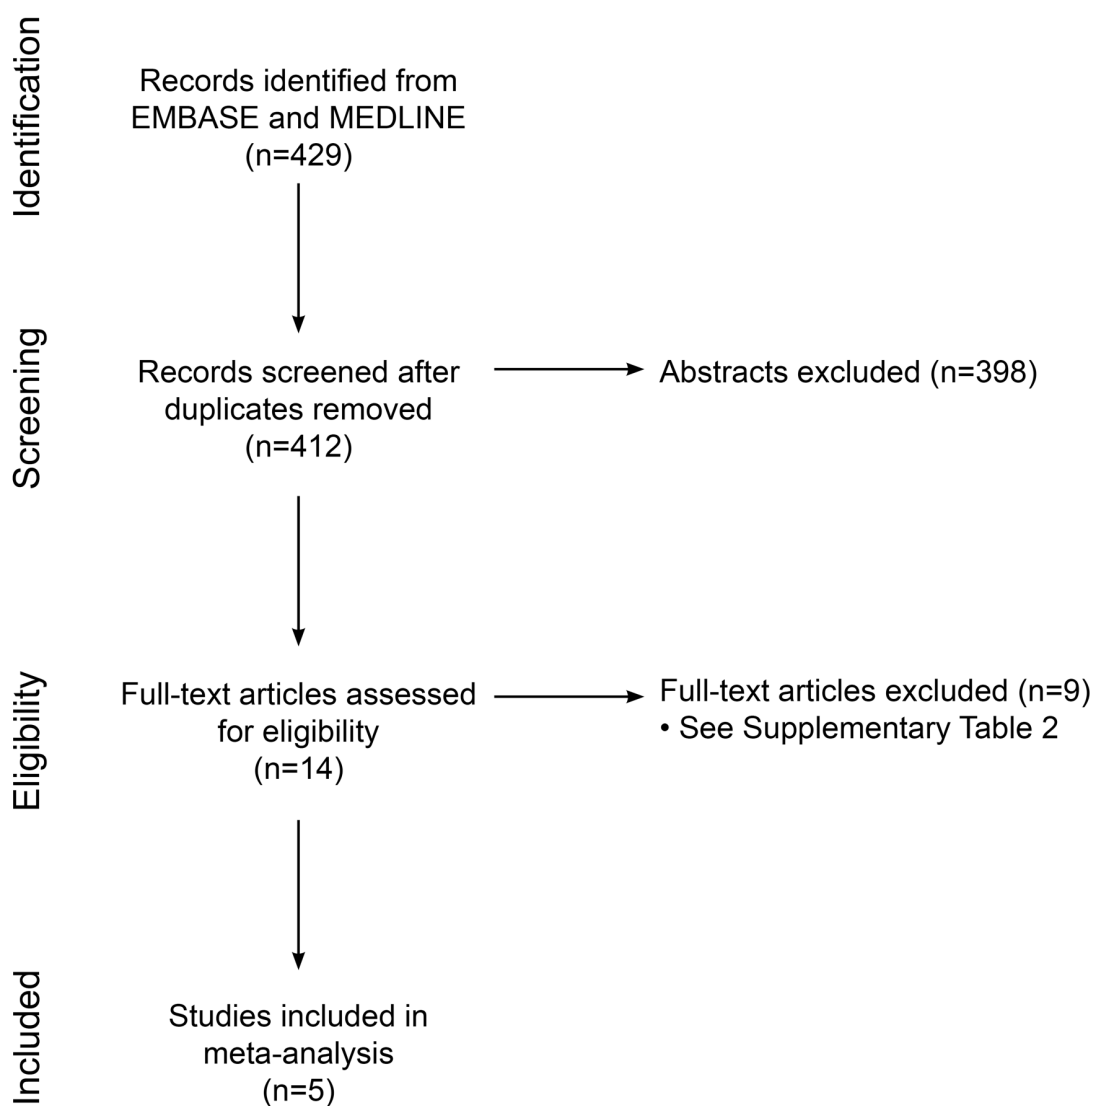

### Supplementary Figure 2. Flow diagram showing study selection

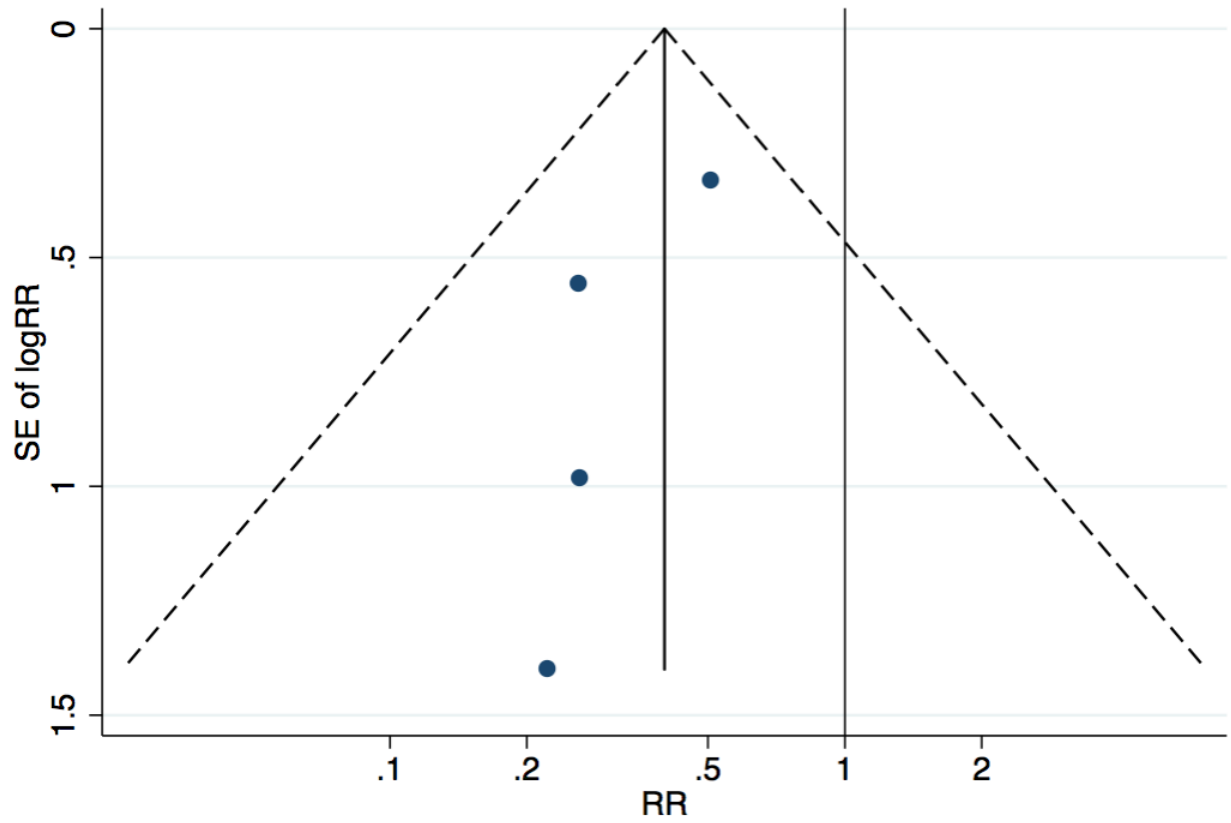

**Supplementary Figure 3.** Funnel plot for the non-randomised studies showing the unadjusted risk ratio for mortality with and without IVIG calculated from the full reported dataset (i.e. irrespective of clindamycin, GAS or STSS)

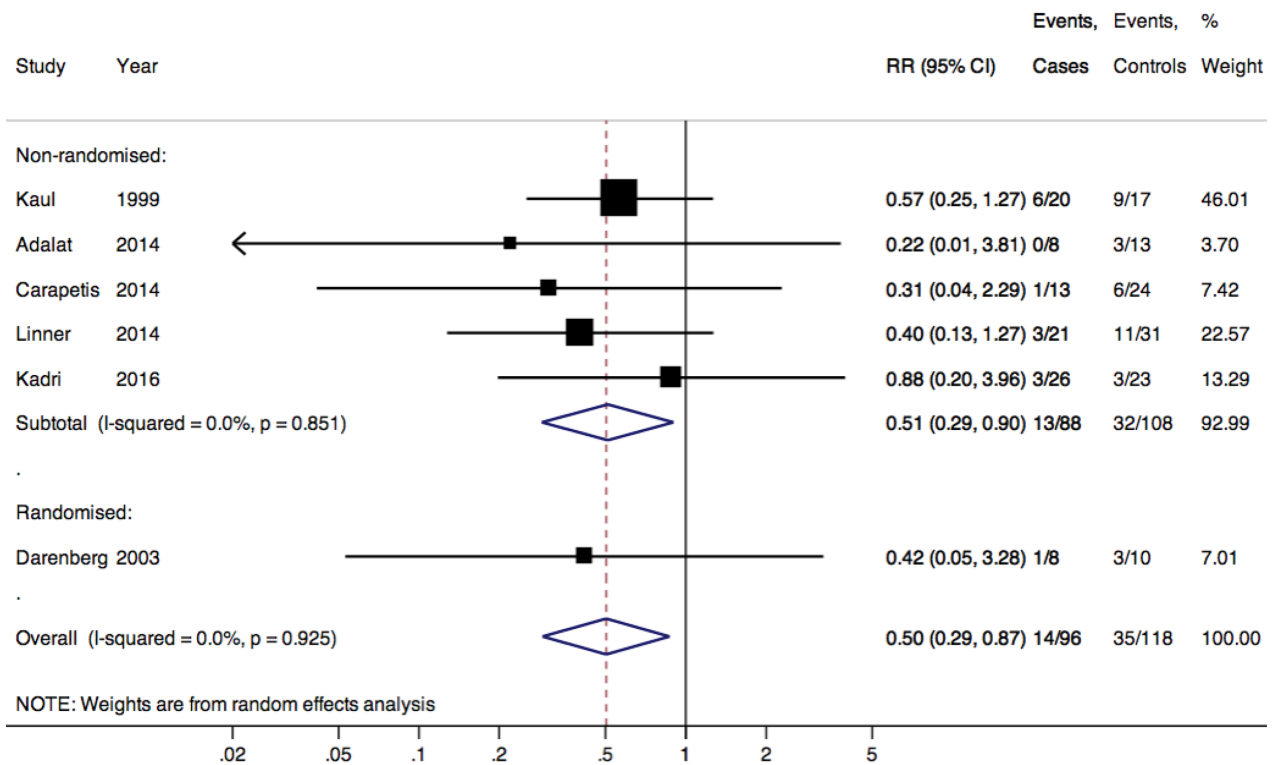

**Supplementary Figure 4.** Forest plot showing the estimated risk ratio for mortality with and without IVIG in clindamycin-treated STSS with the addition of data from the propensity-matched case-control analysis by Kadri *et al.* [12].

**Supplementary Table 1.** Summary of the included studies

| Study                        | Location                             | Year      | Design                                            | Age range                                    | Outcome              | Intervention                            | Cases                                                                                        | Controls                                                                                                        | Ref. |
|------------------------------|--------------------------------------|-----------|---------------------------------------------------|----------------------------------------------|----------------------|-----------------------------------------|----------------------------------------------------------------------------------------------|-----------------------------------------------------------------------------------------------------------------|------|
| Kaul <i>et al.</i> 1999      | Canada                               | 1992-1995 | Non-randomised with historical controls           | Adults (mean 56.8 years; range not reported) | Mortality at 30 days | IVIG vs standard care                   | GAS-associated STSS patients identified prospectively through surveillance treated with IVIG | GAS-associated STSS patients identified prospectively through earlier surveillance <u>not</u> treated with IVIG | [6]  |
| Darenberg <i>et al.</i> 2003 | Sweden, Norway, Finland, Netherlands | 1999-2001 | Randomised double-blind, placebo-controlled trial | Adults (28-83 years)                         | Mortality at 28 days | IVIG vs placebo (equal vol. 1% albumin) | STSS patients enrolled on the basis of suspicion of GAS infection randomised to IVIG         | STSS patients enrolled on the basis of suspicion of GAS infection randomised to placebo                         | [5]  |
| Carapetis <i>et al.</i> 2014 | Australia                            | 2002-2004 | Non-randomised with concurrent controls           | Adults and children (3-88 years)             | Mortality at 30 days | IVIG vs standard care                   | Severe IGAS patients identified prospectively through surveillance treated with IVIG         | Severe IGAS patients identified prospectively through surveillance <u>not</u> treated with IVIG                 | [7]  |
| Linnér <i>et al.</i> 2014    | Sweden                               | 2002-2004 | Non-randomised with concurrent controls           | Adults (31-92 years)                         | Mortality at 28 days | IVIG vs standard care                   | GAS-associated STSS patients identified prospectively through surveillance treated with IVIG | GAS-associated STSS patients identified prospectively through surveillance <u>not</u> treated with IVIG         | [8]  |
| Adalat <i>et al.</i> 2014    | UK                                   | 2008-2009 | Non-randomised with concurrent controls           | Children (0-15 years)                        | Mortality at 28 days | IVIG vs standard care                   | GAS-associated STSS patients identified prospectively through surveillance treated with IVIG | GAS-associated STSS patients identified prospectively through surveillance <u>not</u> treated with IVIG         | [9]  |

**Supplementary Table 2. Summary of the excluded studies**

| Study                             | Location  | Year      | Principal Reason(s) for Exclusion                             | Total IGAS | Proportion STSS | Ref. |
|-----------------------------------|-----------|-----------|---------------------------------------------------------------|------------|-----------------|------|
| Haywood <i>et al.</i> 1999        | Canada    | 1995-1997 | Less than 10 STSS cases                                       | 20         | 5/20 (25%)      | [13] |
| Huang <i>et al.</i> 2001          | Taiwan    | 1995-2000 | Retrospective study                                           | 76         | 12/76 (16%)     | [14] |
| Norrby-Teglund <i>et al.</i> 2005 | Canada    | 1996-2002 | Less than 10 STSS cases                                       | 7          | 6/7 (86%)       | [15] |
| Mehta <i>et al.</i> 2006          | Canada    | 1992-2002 | Subset data unavailable                                       | 62         | 34/62 (55%)     | [10] |
| Aronoff & Mulla 2008              | USA       | 1996-2001 | Retrospective study<br>Less than 10 STSS cases                | 7          | 1/7 (14%)       | [16] |
| Shah <i>et al.</i> 2009           | USA       | 2003-2007 | Retrospective study<br>Consensus criteria not used            | 192        | 192/192 (100%)  | [11] |
| McViety <i>et al.</i> 2014        | UK        | 2008-2013 | Retrospective study<br>No deaths in clindamycin treated cases | 23         | 17/23 (74%)     | [17] |
| Chen <i>et al.</i> 2016           | Australia | 2003-2014 | Retrospective study<br>No deaths in clindamycin treated cases | 19         | 19/19 (100%)    | [18] |
| Kadri <i>et al.</i> 2016*         | USA       | 2010-2014 | Retrospective study<br>Consensus criteria not used            | 228        | 228/228(100%)   | [12] |

\*In total 50 of 228 (21.9%) patients with coding for GAS in the entire study were included in the propensity-matched analysis.

**Supplementary Table 3.** Derivation of subgroup of interest from included studies

| Study                         | Total IGAS | Proportion STSS | Proportion treated with clindamycin | Proportion treated with clindamycin & IVIG (i.e. cases) | Proportion treated with clindamycin & <u>not</u> IVIG (i.e. controls) | Ref. |
|-------------------------------|------------|-----------------|-------------------------------------|---------------------------------------------------------|-----------------------------------------------------------------------|------|
| Kaul <i>et al.</i> 1999*      | 53         | 53/53 (100%)    | 37/53 (37%)                         | 20/37 (54%)                                             | 17/37 (46%)                                                           | [6]  |
| Darenberg <i>et al.</i> 2003  | 18         | 18/18 (100%)    | 18/18 (100%)                        | 8/18 (44%)                                              | 10/18 (56%)                                                           | [5]  |
| Carapetis <i>et al.</i> 2014† | 84         | 49/84 (58%)     | 37/49 (76%)                         | 13/37 (35%)                                             | 24/37 (65%)                                                           | [7]  |
| Linnér <i>et al.</i> 2014     | 746        | 67/746 (9%)     | 52/67 (78%)                         | 21/52 (40%)                                             | 31/52 (60%)                                                           | [8]  |
| Adalat <i>et al.</i> 2014     | 29         | 29/29 (100%)    | 21/29 (72%)                         | 8/21 (38%)                                              | 13/21 (62%)                                                           | [9]  |

\*Data on clindamycin not available for one control who died.

†Includes severe IGAS patients with and without STSS; 49 classified as having STSS.

**Supplementary Table 4. Risk of bias in the non-randomised studies [19]**

| Study                        | Confounding at baseline* | Bias in selection | Bias in classification | Bias in deviations | Bias in missingness | Bias in measurement | Bias in reporting | Ref. |
|------------------------------|--------------------------|-------------------|------------------------|--------------------|---------------------|---------------------|-------------------|------|
| Kaul <i>et al.</i> 1999      | Moderate                 | Low               | Low                    | Low                | Low                 | Low                 | Low               | [6]  |
| Carapetis <i>et al.</i> 2014 | Moderate                 | Low               | Moderate               | Low                | Low                 | Low                 | Moderate          | [7]  |
| Linnér <i>et al.</i> 2014    | Moderate                 | Low               | Moderate               | Low                | Low                 | Low                 | Low               | [8]  |
| Adalat <i>et al.</i> 2014    | Serious                  | Low               | Moderate               | Low                | Low                 | Low                 | Low               | [9]  |

\*Data included in the meta-analysis was corrected for confounding only by limiting the analysis to patients treated with clindamycin.

**Supplementary Table 5. Risk of bias in the randomized control trial [20]**

| Study                        | Bias in selection | Bias in performance | Bias in detection | Bias in attrition | Bias in reporting | Other bias    | Ref. |
|------------------------------|-------------------|---------------------|-------------------|-------------------|-------------------|---------------|------|
| Darenberg <i>et al.</i> 2003 | Unclear*          | Low                 | Low               | Low               | Low               | Stopped early | [5]  |

\*Neither random sequence nor allocation concealment reported.

**Supplementary Table 6.** Summary results of included studies

| Study                         | Mortality in full dataset<br>(i.e. irrespective of clindamycin, GAS or STSS) |             | Mortality in subgroup of interest<br>(i.e. clindamycin-treated STSS) |             | Ref. |
|-------------------------------|------------------------------------------------------------------------------|-------------|----------------------------------------------------------------------|-------------|------|
|                               | Cases                                                                        | Controls    | Cases                                                                | Controls    |      |
| Kaul <i>et al.</i> 1999       | 7/21 (33%)                                                                   | 21/32 (66%) | 6/20 (30%)                                                           | 9/17 (53%)  | [6]  |
| Darenberg <i>et al.</i> 2003  | 1/10 (10%)                                                                   | 4/11 (36%)  | 1/8 (13%)                                                            | 3/10 (30%)  | [5]  |
| Carapetis <i>et al.</i> 2014† | 1/14 (7%)                                                                    | 19/70 (27%) | 1/13 (8%)                                                            | 6/24 (25%)  | [7]  |
| Linnér <i>et al.</i> 2014     | 3/23 (13%)                                                                   | 22/44 (50%) | 3/21 (14%)                                                           | 11/31 (35%) | [8]  |
| Adalat <i>et al.</i> 2014     | 0/8 (0%)                                                                     | 10/41 (24%) | 0/8 (0%)                                                             | 3/13 (23%)  | [9]  |



**Supplementary Table 7.** Derivation of subgroup of interest from the propensity-matched case-control analysis in Kadri *et al.* [12]

| Study                    | Total IGAS | Proportion STSS | Proportion treated with clindamycin | Proportion treated with clindamycin & IVIG (i.e. cases) | Proportion treated with clindamycin & <u>not</u> IVIG (i.e. controls) | Ref. |
|--------------------------|------------|-----------------|-------------------------------------|---------------------------------------------------------|-----------------------------------------------------------------------|------|
| Kadri <i>et al.</i> 2016 | 50*        | 50/50 (100%)†   | 49/50 (100%)                        | 26/49 (53%)                                             | 23/49 (47%)                                                           | [12] |

\*In total 50 of 228 (21.9%) patients with coding for GAS in the entire study were included in the propensity-matched analysis.

†Only 25 of the 49 patients with coding for GAS and clindamycin in the propensity-matched analysis also had coding for toxic shock syndrome. For the purposes of this analysis, however, we presumed all 49 would have met diagnostic criteria for STSS based on the combination of GAS, vasopressor-dependent shock and necrotising infection.

## Supplementary References

13. Haywood CT, McGeer A, Low DE. Clinical experience with 20 cases of group A *Streptococcus necrotizing fasciitis* and myonecrosis: 1995 to 1997. *Plast. Reconstr. Surg.* **1999**; 103:1567–1573.
14. Huang YC, Chiu CH, Chang LY, Leu HS, Lin TY. Characteristics of group A streptococcal bacteremia with comparison between children and adults. *J Microbiol Immunol Infect* **2001**; 34:195–200. Available at: <https://www.ncbi.nlm.nih.gov/pubmed/?term=11605811>.
15. Norrby-Teglund A, Muller MP, McGeer A, et al. Successful management of severe group A streptococcal soft tissue infections using an aggressive medical regimen including intravenous polyspecific immunoglobulin together with a conservative surgical approach. *Scand. J. Infect. Dis.* **2005**; 37:166–172.
16. Aronoff DM, Mulla ZD. Postpartum invasive group A streptococcal disease in the modern era. *Infect Dis Obstet Gynecol* **2008**; 2008:796892–6.
17. McViety J, Horan M, Timmis A, Parkins K. Don't forget IGAS: Lessons learnt from review of 2 peak seasons in the North West and North Wales, UK [Abstract 665]. *Paediatric Critical Care Medicine* **2014**; 15:115.
18. Chen KYH, Cheung M, Burgner DP, Curtis N. Toxic shock syndrome in Australian children. *Arch Dis Child* **2016**; 101:736–740.
19. Sterne JA, Hernán MA, Reeves BC, et al. ROBINS-I: A tool for assessing risk of bias in non-randomised studies of interventions. *BMJ* **2016**; 355:i4919.
20. Higgins JPT, Altman DG, Gøtzsche PC, et al. The Cochrane Collaboration's tool for assessing risk of bias in randomised trials. *BMJ* **2011**; 343:d5928–d5928.
